# Supplementary material for: Antioxidant and Anti-Inflammatory Mechanisms of Lipophilic Fractions from Polyscias fruticosa Leaves Based on Network Pharmacology, In Silico, and In Vitro Approaches
Source: MDPI journal article supplement (doi:10.3390/foods12193643), 2023-10-01
Supplement: s1 [file s1]

Supplementary data

# Antioxidant and Anti-Inflammatory Mechanisms of Lipophilic Fractions from *Polyscias fruticosa* Leaves Based on Network Pharmacology, In Silico, and In Vitro Approaches

Razanamanana H. G. Rarison <sup>1,†</sup>, Van-Long Truong <sup>1,2,†</sup>, Byoung-Hoon Yoon <sup>1</sup>, Ji-Won Park <sup>1</sup> and Woo-Sik Jeong <sup>1,2,\*</sup>

<sup>1</sup> School of Food Science & Biotechnology, College of Agriculture and Life Sciences, Kyungpook National University, Daegu 41566, Republic of Korea;

<sup>2</sup> Food and Bio-industry Research Institute, School of Food Science & Biotechnology, College of Agriculture and Life Sciences, Kyungpook National University, Daegu 41566, Republic of Korea; rhaniranirina@gmail.com (R.H.G.R.); truonglongpro@gmail.com (V.-L.T.); byounghoon97@naver.com (B.-H.Y.); yozi6789@naver.com (J.-W.P.)

\* Correspondence: wsjeong@knu.ac.kr; Tel.: +82-53-950-5775

† These authors contributed equally to this work.

**Supplementary Table S1.** The PDB ID and the box center coordinates for each protein.

| Protein | PDB ID | Grid box center                                                     |
|---------|--------|---------------------------------------------------------------------|
| KEAP1   | 6TYPA  | center_x= -15.749371<br>center_y= 3.679657<br>center_z= 13.115057   |
| NR1I2   | 6P2BA  | center_x= 12.397710<br>center_y= 32.873097<br>center_z= 23.96642    |
| PTGS2   | 5IKQ   | center_x= 21.597621<br>center_y= 51.876966<br>center_z= 17.696379   |
| PRKCD   | 1YRK   | center_x= 25.614261<br>center_y= 43.053774<br>center_z= 21.103087   |
| NFKB1   | 1SCV   | center_x= 27.792003<br>center_y= 30.851276<br>center_z= 27.702665   |
| TLR4    | 3FXI   | center_x= 27.128832<br>center_y= -10.816630<br>center_z= 13.134016  |
| NFE2L2  | 7X5E   | center_x= -42.091138<br>center_y= -18.945142<br>center_z= 20.259611 |

**Supplementary Table S2.** Top 10 active compounds in PFL obtained from PFL compounds-target network.

| Active compounds                            | Degree | Betweenness Centrality | Closeness Centrality |
|---------------------------------------------|--------|------------------------|----------------------|
| Falcarinol                                  | 62     | 0.01856039             | 0.43831169           |
| (Z)-1,3-Phytadiene                          | 61     | 0.02731567             | 0.4368932            |
| Copaene                                     | 60     | 0.01315604             | 0.43548387           |
| (3.beta.,5.alpha.)-Stigmasta-7,16-dien-3-ol | 60     | 0.0148525              | 0.43548387           |
| Ylangene                                    | 60     | 0.01315604             | 0.43548387           |
| Alloisolongifolene alcohol                  | 57     | 0.02326424             | 0.4313099            |
| (+)-gamma-Cadinene                          | 56     | 0.01389639             | 0.42993631           |
| Neoclovene oxide                            | 56     | 0.01298989             | 0.42993631           |
| Stigmasterol                                | 56     | 0.01056441             | 0.42993631           |
| Actinidiolide, dihydro-                     | 55     | 0.03256982             | 0.42857143           |

**Supplementary Table S3.** Top 15 target genes obtained from PFL compounds-target network.

| Targets                                              | Degree | Betweenness Centrality | Closeness Centrality |
|------------------------------------------------------|--------|------------------------|----------------------|
| Nuclear factor NF-kappa-B p50 (NFKB1)                | 71     | 0.030183613            | 0.575692964          |
| DNA-(apurinic or apyrimidinic site) lyase (APEX1)    | 70     | 0.02926807             | 0.573248408          |
| Cyclooxygenase-1 (PTGS1)                             | 60     | 0.018021206            | 0.526315789          |
| Cytochrome P450 3A4 (CYP3A4)                         | 60     | 0.019300353            | 0.532544379          |
| Pregnane X receptor (NR1I2)                          | 59     | 0.022330441            | 0.543259557          |
| Acyl-CoA desaturase (SCD)                            | 58     | 0.015428461            | 0.512333966          |
| Nuclear factor erythroid 2-related factor 2 (NFE2L2) | 55     | 0.020523533            | 0.532544379          |
| Androgen Receptor (AR)                               | 53     | 0.01393878             | 0.512333966          |
| Casein kinase II alpha/beta (CSNK2B)                 | 53     | 0.016134787            | 0.51625239           |
| Protein-tyrosine phosphatase 1B (PTPN1)              | 52     | 0.015745039            | 0.51625239           |
| Toll-like receptor 4 (TLR4)                          | 49     | 0.010901582            | 0.491803279          |
| Cyclooxygenase-2 (PTGS2)                             | 48     | 0.013486764            | 0.504672897          |
| Protein kinase C delta (PRKCD)                       | 48     | 0.010764119            | 0.495412844          |
| Aminopeptidase N (ANPEP)                             | 48     | 0.012798254            | 0.497237569          |
| Kelch-like ECH-associated protein 1 (KEAP1)          | 46     | 0.013118779            | 0.504672897          |

**Supplementary Table S4.** Molecular docking results of key active compounds in PFL and the hub genes

| Protein | PBD ID | Compounds                                   | Binding energy (kcal/mol) | Interactions                                                                                      |                                                                                                                                                                                                                                        |
|---------|--------|---------------------------------------------|---------------------------|---------------------------------------------------------------------------------------------------|----------------------------------------------------------------------------------------------------------------------------------------------------------------------------------------------------------------------------------------|
|         |        |                                             |                           | Alkyl/ Pi-Alkyl/Pi-Sigma/Unfavorable donor-donor/Carbon hydrogen bond/ Conventional hydrogen bond | Van der Waals                                                                                                                                                                                                                          |
| KEAP1   | 6TYP   | Stigmasterol                                | -9.9                      | Ala366, Arg415, Val465, Ala556                                                                    | Tyr334, Ser363, Gly364, Leu365, Gly367, Arg380, Asn414, Val418, Gly462, Val463, Gly464, Ala466, Gly509, Ala510, Gly511, Val512, Leu557, Ile559, Gly603, Val604, Gly605, Val606                                                         |
|         |        | (3.beta.,5.alpha.)-Stigmasta-7,16-dien-3-ol | -9.4                      | Cys513, Ala556                                                                                    | Gly364, Leu365, Ala366, Gly367, Cys368, Arg415, Ile416, Gly417, Val418, Gly419, Val420, Gly462, Val463, Gly464, Val465, Ala466, Gly509, Ala510, Gly511, Val512, Val514, Leu557, Gly558, Ile559, Gly603, Val604, Gly605, Val606, Ala607 |
|         |        | Copaene                                     | -6.7                      | Ala366                                                                                            | Leu365, Gly367, Ile416, Gly417, Val463, Gly464, Val465, Gly509, Ala510, Gly511, Val512, Ala556, Leu557, Gly558, Ile559, Gly603, Val604, Gly605, Val606                                                                                 |
|         |        | (+)-gamma-Cadinene                          | -6.7                      | Tyr334, Ala556, Tyr572, Phe577                                                                    | Ser555, Arg415, Arg380, Ser363, Ser603                                                                                                                                                                                                 |
|         |        | Ylangene                                    | -6.9                      | Tyr334, Arg415, Ala556                                                                            | Ser363, Gly364, Arg380, Tyr572, Phe577, Ser602, Gly603                                                                                                                                                                                 |
|         |        | Alloisolongifolene alcohol                  | -7                        | Ala366, Gly462                                                                                    | Leu365, Gly367, Ile416, Gly417, Val418, Val463, Gly464, Val465, Gly509, Ala510, Gly511, Val512, Ala556, Leu557, Ile559, Val604, Gly605, Val606                                                                                         |
|         |        | Neoclovene oxide                            | -7.3                      |                                                                                                   | Leu365, Ala366, Gly367, Ile416, Gly417, Val418, Val463, Gly464, Val465, Ala510, Gly511, Val512, Leu557, Gly558, Ile559, Val604, Val606                                                                                                 |
|         |        | Actinidiolide, dihydro-                     | -6.5                      | Gly367, Val606                                                                                    | Leu365, Ala366, Gly417, Val418, Val463, Gly464, Val465, Ala510, Gly511, Val512, Leu557, Gly558, Ile559, Val604, Gly605                                                                                                                 |

|       |      |                                             |      |                                                                                        |                                                                                                                        |
|-------|------|---------------------------------------------|------|----------------------------------------------------------------------------------------|------------------------------------------------------------------------------------------------------------------------|
| NR112 | 6P2B | Falcarinol                                  | -5.6 | Ala366, Ile416, Val463, Val465, Val512                                                 | Gly364, Leu365, Gly367, Arg415, Gly417, Val418, Gly462, Gly464, Gly509, Ala510, Gly511, Ile559, Val604, Gly605, Val606 |
|       |      | (Z)-1,3-Phytadiene                          | -5.6 | Tyr334, Ile461, Phe478, Tyr525, Ala556, Tyr572                                         | Arg380, Arg415, Gly462, Arg483, Ser508, Gly509, Gln530, Ser555, Phe577, Ser602, Gly603                                 |
|       |      | Stigmasterol                                | -7.9 | Lys170, Leu174, Leu215, Trp223                                                         | Phe172, Pro175, Val177, Leu213, Gly217, Glu218, Asn224, Tyr225, Arg303                                                 |
|       |      | (3.beta.,5.alpha.)-Stigmasta-7,16-dien-3-ol | -6.9 | Phe172, Trp223                                                                         | Asn171, Leu174, Pro175, Val177, Leu215, Tyr225, Arg303                                                                 |
|       |      | Copaene                                     | -8.7 | Phe288, Trp299, Met323                                                                 | Leu209, Val211, Met243, Gln285, Tyr306, Leu308, Leu324, His327                                                         |
|       |      | (+)-gamma-Cadinene                          | -7.6 | Leu209, Val211, Phe288, Trp299, Leu308, Leu324, His327                                 | Met243, Gln285, Met323                                                                                                 |
|       |      | Ylangene                                    | -8.6 | Phe288, Trp299, Tyr306, Met323                                                         | Leu209, Val211, Met243, Gln285, Leu308, Leu324, His327                                                                 |
|       |      | Alloisolongifolene alcohol                  | -8.3 | Val211, Trp299                                                                         | Leu209, Met243, Gln285, Phe288, Tyr306, Leu308, Met323, Leu324, His327                                                 |
|       |      | Neoclovene oxide                            | -8   | Phe288, Trp299, Met323, His327                                                         | Leu209, Val211, Met243, Phe281, Gln285, Tyr306, His407                                                                 |
|       |      | Actinidiolide, dihydro-                     | -7.5 | Val211, Trp299, His327                                                                 | Leu209, Met243, Gln285, Phe288, Tyr306, Met323, Leu324                                                                 |
|       |      | Falcarinol                                  | -6.4 | Leu206, Leu209, Val211, Met243, Phe288, Trp299, Tyr306, Met323, Leu324, His327, His407 | Leu240, Gln285, Leu308, Arg410                                                                                         |
|       |      | (Z)-1,3-Phytadiene                          | -6.1 | Leu206, Leu209, Val211, Leu240, Met243, Phe288, Trp299, Tyr306, Met323, His407         | Gln285, Ile414, Phe420, Leu411, Leu324                                                                                 |
| PTGS2 | 5IKQ | Stigmasterol                                | -8.9 | Leu294, Leu391, Tyr404, Ile408, Ala443, Val444                                         | Ala202, Gln203, His207, Tyr385, His386, Trp387, His388, Leu390, Val447                                                 |
|       |      | (3.beta.,5.alpha.)-Stigmasta-7,16-dien-3-ol | -8.8 |                                                                                        | Ala199, Ala202, Gln203, Thr206, His207, Leu294, Val295, Tyr385, Trp387, His388, Leu390, Leu391, Ile408, Val444, Val447 |
|       |      | Copaene                                     | -8   | Val349, Leu352, Tyr355, Val523, Ala527                                                 | Tyr348, Ser353, Phe381, Leu384, Tyr385, Trp387, Phe518, Met522, Gly526, Ser530                                         |

|       |      |                                             |      |                                                                                |                                                                                        |
|-------|------|---------------------------------------------|------|--------------------------------------------------------------------------------|----------------------------------------------------------------------------------------|
| PRKCD | 1YRK | (+)-gamma-Cadinene                          | -8.8 | Val349, Leu352, Val523, Ala527, Leu531                                         | Tyr348, Ser353, Phe381, Leu384, Tyr385, Trp387, Phe518, Met522, Gly526, Ser530         |
|       |      | Ylangene                                    | -7   | Tyr348, Val349, Leu352, Val523, Ala527                                         | Phe281, Ser353, Leu384, Tyr385, Trp387, Phe518, Met522, Gly526, Ser530                 |
|       |      | Alloisolongifolene alcohol                  | -6.3 | Arg120, Glu524                                                                 | Lys83, Pro84, Pro86, Val89, Tyr115, Ser119, His122, Leu123, Met471, Leu472             |
|       |      | Neoclovene oxide                            | -6.6 | Val348, Leu352, Val523                                                         | Tyr348, Ser353, Tyr355, Trp387, Phe518, Met522, Gly526, Ala527, Ser530                 |
|       |      | Actinidiolide, dihydro-                     | -6.7 | Leu352, Val523, Ala527                                                         | Tyr348, Val349, Ser353, Phe381, Tyr385, Trp387, Phe518, Met522, Gly526, Ser530, Leu531 |
|       |      | Falcarinol                                  | -7.1 | Arg120, Val349, Leu352, Tyr385, Trp387, Phe518, Val523, Ala527                 | Val116, Tyr348, Ser350, Ser353, Tyr355, Leu359, Phe381, Leu384, Met522, Gly526, Leu531 |
|       |      | (Z)-1,3-Phytadiene                          | -7.1 | Val116, Ile345, Tyr348, Val349, Leu352, Tyr355, Leu359, Val523, Ala527, Leu531 | Met113, Arg120, Ser353, Phe381, Leu384, Tyr385, Trp387, Phe518, Met522, Gly526, Ser530 |
|       |      | Stigmasterol                                | -7.5 | Phe27, Tyr52, Ala77                                                            | Gln25, Glu54, Trp55, Met74, Glu78                                                      |
|       |      | (3.beta.,5.alpha.)-Stigmasta-7,16-dien-3-ol | -6.7 | Phe27, Tyr52, Ala77                                                            | Gln25, Glu54, Trp55                                                                    |
|       |      | Copaene                                     | -5.7 | Phe27, Tyr52                                                                   | Pro53, Glu53                                                                           |
|       |      | (+)-gamma-Cadinene                          | -6.1 | Phe27                                                                          | Tyr52, Pro53, Glu54                                                                    |
|       |      | Ylangene                                    | -5.8 | Phe27, Tyr52                                                                   | Cys28, Pro53, Glu54                                                                    |
|       |      | Alloisolongifolene alcohol                  | -5.3 | Gln25, Phe27, Trp55                                                            | Pro26, Tyr52, Glu54                                                                    |
|       |      | Neoclovene oxide                            | -5.2 | Phe27                                                                          | Tyr52, Pro53, Glu54, Trp55                                                             |
| NFKB1 | 1SCV | Actinidiolide, dihydro-                     | -4.8 | Phe27                                                                          | Gln25, Pro26, Tyr52, Pro53, Glu54, Trp55                                               |
|       |      | Falcarinol                                  | -4.8 | Pro26, Phe27, Tyr52                                                            | Gln25, Pro53, Glu54, Trp55                                                             |
|       |      | (Z)-1,3-Phytadiene                          | -4.7 | Phe27, Tyr52, Trp55, Ala77                                                     | Gln25, Pro26, Pro53, Glu54                                                             |
|       |      | Stigmasterol                                | -7   | Tyr60, Val61, Val145                                                           | Ala62, Glu63, Leu143, His144, Thr146, Lys149, Thr153, Ala156, Arg157                   |
|       |      | (3.beta.,5.alpha.)-Stigmasta-7,16-dien-3-ol | -6.8 | Phe56, Arg59, Lys80                                                            | Lys52, Gly55, Arg57, His67, Gly68, Gly69, Pro71, Ser74, Ser75, Glu76, Lys79, Ser81     |
|       |      | Copaene                                     | -5.5 | Val61, Leu143, Val145, Lys149                                                  | Ser113, Thr146, Thr153, Arg157                                                         |
|       |      | (+)-gamma-Cadinene                          | -5.8 | Val61, Leu143, Val145, Lys149                                                  |                                                                                        |
|       |      | Ylangene                                    | -5.4 | Val61, Leu143, Val145, Lys149                                                  | Ser113, Thr146, Thr153, Arg157                                                         |

|        |      |                                             |      |                                             |                                                                                                |
|--------|------|---------------------------------------------|------|---------------------------------------------|------------------------------------------------------------------------------------------------|
| TLR4   | 3FXI | Alloisolongifolene alcohol                  | -5.4 | Ser113, Leu143                              | Val61, Ala111, His112, His144, Val145, Thr146, Lys149, Thr153, Arg157                          |
|        |      | Neoclovene oxide                            | -5.2 | Lys275                                      | Arg57, Ser243, Lys244, Ser249, Asn250, Asp274, Phe310                                          |
|        |      | Actinidiolide, dihydro-                     | -5.3 | Val61, Ser113, Arg157                       | Ala111, His112, Leu143, Val145, Lys149, Thr153                                                 |
|        |      | Falcarinol                                  | -5.2 | Phe56, Arg57, Arg59, Pro65, Val115, Leu143  | Lys52, Gly55, Gly64, His67, Gly68, Pro71, Gly141, Ile142                                       |
|        |      | (Z)-1,3-Phytadiene                          | -5.1 | Phe56, Arg59, Pro65, Val115, Lys117, Leu143 | Tyr60, Val61, Gly64, His67, Gly68, Gly116, Asn139, Gly141, Ile142                              |
|        |      | Stigmasterol                                | -6.4 | Ser360, His431, His458                      | Asn339, Asn361, Lys362, Arg382, Asn383, Gly384, Phe408, Asn409, Ser432, Asn433, His456, Thr457 |
|        |      | (3.beta.,5.alpha.)-Stigmasta-7,16-dien-3-ol | -5.8 | Tyr295                                      |                                                                                                |
|        |      | Copaene                                     | -5.5 | Leu212                                      | Pro214, Asn235, Asn236, Phe237, Asp238, Glu266, Gly267                                         |
|        |      | (+)-gamma-Cadinene                          | -5.3 | Ala291, Val316                              | Arg234, Phe263, Arg264, Arg289, Tyr292, Ser317                                                 |
|        |      | Ylangene                                    | -5.3 | Pro214                                      | Leu212, Asn235, Phe237, Asp238, Glu266, Gly267                                                 |
|        |      | Alloisolongifolene alcohol                  | -5.3 | Asn339, Lys341                              | Arg264, Tyr292, Leu293, Asp294, Tyr296, Ser317, Val318, Thr319, Cys340, Lys362                 |
|        |      | Neoclovene oxide                            | -5.6 |                                             | Arg264, Tyr292, Leu293, Asp294, Tyr296, Ser317, Val318, Thr319, Lys341, Lys362                 |
|        |      | Actinidiolide, dihydro-                     | -5.4 | Tyr292, Ser317                              | Arg264, Leu293, Asp294, Tyr296, Val318, Thr319, Cys340, Lys341, Lys362                         |
|        |      | Falcarinol                                  | -4.2 | Arg264, Tyr292, Tyr296                      | Asn268, Leu293, Asp294, Ser317, Val318, Thr319, Lys362                                         |
| NFE2L2 | 7X5E | (Z)-1,3-Phytadiene                          | -3.7 | Leu212, Pro214                              | Asn235, Asn236, Phe237, Asp238, Glu266, Gly267                                                 |
|        |      | Stigmasterol                                | -6.6 | Phe481, Arg499, Arg502, Arg503, Lys506      | Asn482, Met485, Asn507, Ala510                                                                 |
|        |      | (3.beta.,5.alpha.)-Stigmasta-7,16-dien-3-ol | -6.1 | Val478, Arg499, Arg503                      | Phe481, Arg502, Lys506                                                                         |
|        |      | Copaene                                     | -6.1 | Arg499, Arg502, Arg503                      | Lys506                                                                                         |
|        |      | (+)-gamma-Cadinene                          | -6.2 | Phe481, Arg499, Arg502, Lys506              | Val478, Asn482, Arg503                                                                         |
|        |      | Ylangene                                    | -6   | Arg499, Arg502, Arg503                      | Lys506                                                                                         |
|        |      | Alloisolongifolene alcohol                  | -5.5 | Arg503                                      | Arg499, Asp500, Arg502, Lys506                                                                 |



|  |                         |      |                                                |                                        |
|--|-------------------------|------|------------------------------------------------|----------------------------------------|
|  | Neoclovene oxide        | -5.9 | Arg503                                         | Val478, Phe481, Arg499, Arg502, Lys506 |
|  | Actinidiolide, dihydro- | -5.4 | Arg499, Arg502, Arg503                         | Phe481, Lys506                         |
|  | Falcarinol              | -4.7 | Val478, Phe481, Arg499, Arg502, Arg503, Lys506 | Asp500                                 |
|  | (Z)-1,3-Phytadiene      | -4.2 | Val478, Phe481, Arg499, Arg502, Arg503, Lys506 | Asn482                                 |
